# Supplementary material for: Rank orders and signed interactions in evolutionary biology
Source: eLife journal article supplement (doi:10.7554/elife.51004), 2020-01-14
Supplement: supp [file elife-51004-supp-v1.zip]

Archive with 1 entries (1 files):
- elife_poa_e51004_Transparent_Reporting_File.pdf
